# Supplementary material for: Pastoralist knowledge of sheep and goat disease and implications for peste des petits ruminants virus control in the Afar Region of Ethiopia
Source: PubMed Central journal article supplement (PMC6983938; doi:10.1016/j.prevetmed.2019.104808), 2020-01
Supplement: mmc2.pdf [file mmc2.pdf]

6. During the last one week, how many sheep and goats did you give away? (give the number and the reason)

ገለግሎት: ሄንደ: ሳጥን: ጥንቃቄ: ጠንቅ: ፍጥነት: ጠላት: ለጠንቅ?

ቁጥሩ: የሰጠውበት: የጥንቃቄ: ጠላት.

|         |      |          |      |
|---------|------|----------|------|
| Lagaday | 1264 | Moyu     | 908  |
| Anayee  | 458  | Bokole   | 1706 |
| Gahsuru | 2414 | Giregire | 2026 |
| Sebeni  | 1012 | Rehido   | 648  |
| Marua   | 9001 | Debela   | 1011 |
| ida     | 48   | Reita    | 1021 |

7. During the last one week, how many sheep and goats did you receive as gifts?

ገለግሎት: ሄንደ: ሳጥን: ጥንቃቄ: ጠንቅ: ፍጥነት: ጠላት: ጥንቅቅ/አጠቃላይ?

|         |      |          |      |
|---------|------|----------|------|
| Lagaday | 1264 | Moyu     | 908  |
| Anayee  | 458  | Bokole   | 1706 |
| Gahsuru | 2414 | Giregire | 2026 |
| Sebeni  | 1012 | Rehido   | 648  |
| Marua   | 9001 | Debela   | 1011 |
| ida     | 48   | Reita    | 1021 |

8. During the last one week, how many sheep and goats did you slaughter? (give number and reason)

ገለግሎት: ሄንደ: ሳጥን: ጥንቃቄ: ጠንቅ: ፍጥነት: ጥንቅቅ? ቁጥሩ/ጠንቅ?

የሰጠው: የጥንቃቄ: ጠላት.

|         |      |          |      |
|---------|------|----------|------|
| Lagaday | 1264 | Moyu     | 908  |
| Anayee  | 458  | Bokole   | 1706 |
| Gahsuru | 2414 | Giregire | 2026 |
| Sebeni  | 1012 | Rehido   | 648  |
| Marua   | 9001 | Debela   | 1011 |
| ida     | 48   | Reita    | 1021 |

Remarks
